# Supplementary material for: Solvent free mechanochemical synthesis of Eu3+ complex and its luminescent sensing of trace water and temperature
Source: Royal Society of Chemistry journal article supplement (doi:10.1039/c6ra28099d), 2017-01-01
Supplement: c6ra28099d1.pdf [file c6ra28099d1.pdf]

## Supporting Information

for

Solvent free mechanochemical synthesis of  $\text{Eu}^{3+}$  complex  
and its luminescent sensing for trace water and  
temperature

Daqing Yang, Zhiqiang Li, Liang He, Yuchen Deng and Yige Wang\*

*School of Chemical Engineering and Technology*

*Hebei University of Technology*

*GuangRong Dao 8, Hongqiao Distric, Tianjin 300130 (China)*

E-mail: wangyige@hebut.edu.cn

## Table of Contents

|                                                                                                                                                                                                               |    |
|---------------------------------------------------------------------------------------------------------------------------------------------------------------------------------------------------------------|----|
| <b>Fig. S1</b> TG analysis of 1:1 Eu(L) complex                                                                                                                                                               | S3 |
| <b>Fig. S2</b> Luminescence decay curves of Eu(L) <sub>n</sub> measured at 613 nm and well-fitted by a mono-exponential function                                                                              | S3 |
| <b>Table S1</b> The variable intensity ratio <i>R</i> and luminescence decay time with the increasing water content in anhydrous ether                                                                        | S3 |
| <b>Table S2</b> The calibration equations of Eu(L) <sub>1</sub> in different organic solvents with increasing amount of water                                                                                 | S4 |
| <b>Table S3</b> The variable intensity ratio <i>R</i> and luminescence decay time with the increasing water content in anhydrous THF                                                                          | S4 |
| <b>Table S4</b> The calibration equations of Eu(L) <sub>1</sub> within the temperature ranging from 80-300 K and the temperature in heating cooling process from 300-420 K and cooling process from 400-300 K | S4 |
| <b>Fig. S3</b> Temperature dependence of the relative sensitivity values for Eu(L) <sub>1</sub> within the temperatures range 80-300 K and 300-420 K                                                          | S5 |

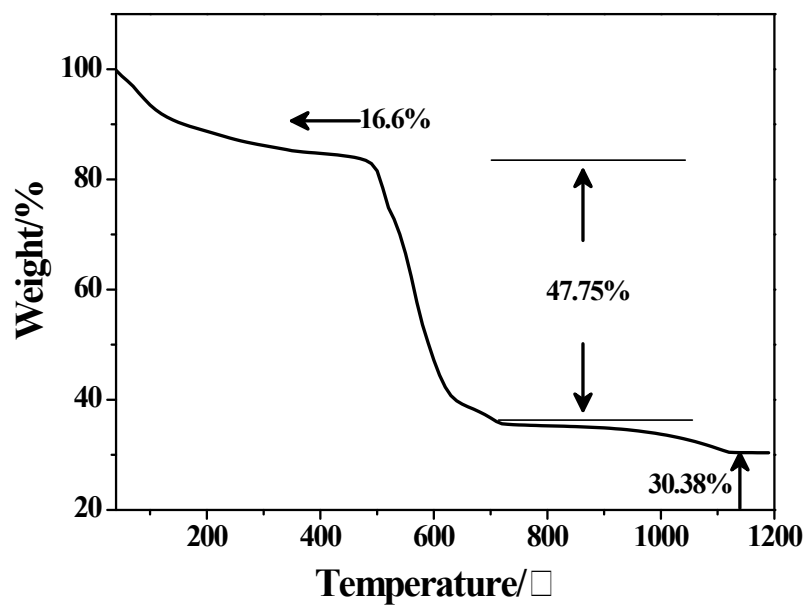

**Fig. S1** TG analysis of 1:1 Eu(L) complex.

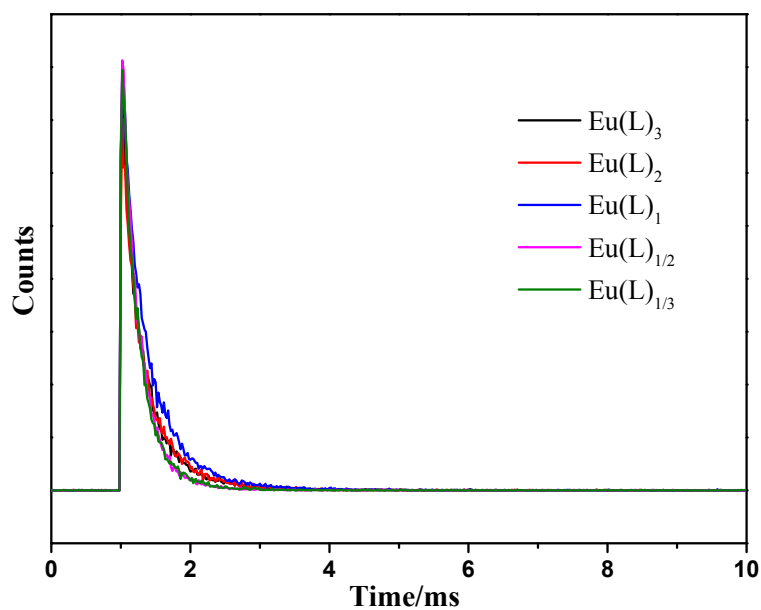

**Fig. S2** Luminescence decay curves of Eu(L)<sub>*n*</sub> measured at 613 nm and well-fitted by a mono-exponential function.

**Table S1.** The variable intensity ratio *R* and luminescence decay time with the increasing water content in anhydrous ether.

|             | Ether | 0.1% | 0.2% | 0.3% | 0.5% | 1%   | 2%   | 3%   | 5%   |
|-------------|-------|------|------|------|------|------|------|------|------|
| <i>R</i>    | 2.68  | 2.46 | 2.14 | 1.71 | 1.62 | 1.56 | 1.43 | 1.32 | 1.16 |
| $\tau$ [ms] | 0.24  | 0.22 | 0.21 | 0.19 | 0.8  | 0.17 | 0.16 | 0.13 | 0.10 |

**Table S2.** The calibration equations of  $\text{Eu}(\text{L})_1$  in different organic solvents with increasing amount of water.

| Solvents | Range of $v$ (%) | Calibration equations | $R^2$ |
|----------|------------------|-----------------------|-------|
| ether    | 0%-0.3%          | $R = -3.23v + 2.73$   | 0.993 |
| ether    | 0.5%-5%          | $R = -0.11v + 1.67$   | 0.993 |
| THF      | 0%-5%            | $R = -0.33v + 2.92$   | 0.995 |

**Table S3.** The variable intensity ratio  $R$  and luminescence decay time with the increasing water content in anhydrous THF.

|             | THF  | 0.1% | 0.3% | 0.5% | 1%   | 2%   | 3%   | 5%   |
|-------------|------|------|------|------|------|------|------|------|
| $R$         | 2.94 | 2.90 | 2.83 | 2.73 | 2.61 | 2.26 | 1.84 | 1.30 |
| $\tau$ [ms] | 0.27 | 0.26 | 0.26 | 0.24 | 0.22 | 0.19 | 0.18 | 0.15 |

**Table S4.** The calibration equations of  $\text{Eu}(\text{L})_1$  within the temperature ranging from 80-300 K and the temperature in heating cooling process from 300-420 K and cooling process from 400-300 K.

| Range of $T$ (K) | Calibration equations  | $R^2$ | $S$ (% $\text{K}^{-1}$ ) |
|------------------|------------------------|-------|--------------------------|
| 80-300           | $T_1 = 491.1 - 405I_1$ | 0.995 | 0.24%                    |
| 300-420          | $T_2 = 427.4 - 125I_2$ | 0.998 | 0.77%                    |
| 400-300          | $T_3 = 409.4 - 167I_3$ | 0.998 | 0.59%                    |

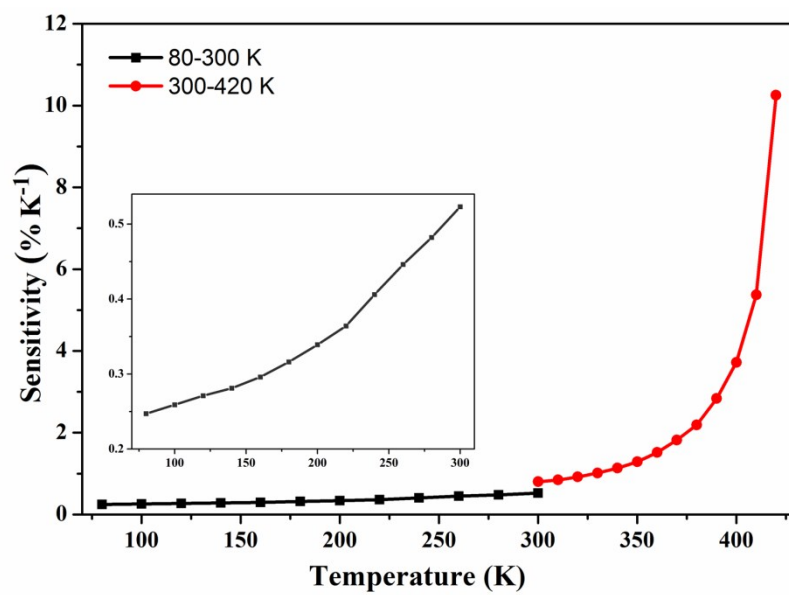

**Fig. S3** Temperature dependence of the relative sensitivity values for  $\text{Eu}(\text{L})_1$  within the temperatures range 80-300 K and 300-420 K.
